# Supplementary material for: Positional Behavior of Introduced Monk Parakeets (Myiopsitta monachus) in an Urban Landscape
Source: MDPI journal article supplement (doi:10.3390/ani12182372), 2022-09-11
Supplement: s1 [file s1]

## Supplemental Tables

**Supplementary Table S1.** Overall percentage (%) of positional behaviors collected from an established colony of Quaker parrots (*Myiopsitta monachus*) from Brooklyn, New York City during the study period. Percentages of locomotor repertoire calculated for all behaviors and for non-aerial (i.e., excluding flight and hovering) behaviors.

| Locomotion               |       |            |
|--------------------------|-------|------------|
|                          | All   | Non-aerial |
| Flight                   | 67.51 | na         |
| Hover                    | 4.40  | na         |
| Flight short interbranch | 11.05 | 39.34      |
| Bridge                   | 0.08  | 0.27       |
| Climb                    | 1.30  | 4.64       |
| Climb beak-assisted      | 0.92  | 3.28       |
| Climb wing-assisted      | 0.90  | 3.19       |
| Descent                  | 0.41  | 1.46       |
| Descent beak-assisted    | 0.33  | 1.18       |
| Descent wing-assisted    | 0.46  | 1.64       |
| Hop                      | 0.72  | 2.55       |
| Leap                     | 0.20  | 0.73       |
| Leap wing-assisted       | 2.38  | 8.47       |
| Run                      | 0.20  | 0.73       |
| Sidling                  | 3.20  | 11.38      |
| Suspensory               | 0.10  | 0.36       |
| Uprighting               | 0.13  | 0.46       |
| Walk                     | 5.70  | 20.31      |
| Number of observations   | 3909  | 1098       |
| Posture                  |       |            |
| Cantilevering            | 0.23  |            |
| Cling                    | 0.37  |            |
| Hang                     | 0.19  |            |
| Perch                    | 96.93 |            |
| Stand                    | 2.28  |            |
| Number of observations   | 7337  |            |

**Supplemental Table S2.** Overall percentage (%) of weather conditions and the associated positional behaviors collected from an established colony of Quaker parrots (*Myiopsitta monachus*) from Brooklyn, New York City during the study period. No substrate or orientation code was scored if the animals' feet were not in contact with the support (e.g., flight, hovering).

|                          | <b>Overcast</b> | <b>Rain</b> | <b>Snow</b> | <b>Sun</b> |
|--------------------------|-----------------|-------------|-------------|------------|
| Pooled                   | 26.27           | 4.79        | 0.10        | 68.84      |
| Number of observations   | 2954            | 539         | 11          | 7742       |
| <b>Locomotion</b>        |                 |             |             |            |
| Flight                   | 61.70           | 80.90       | 100.00      | 68.36      |
| Hover                    | 6.04            | 2.51        | 0.00        | 4.00       |
| Flight short interbranch | 12.84           | 7.04        | 0.00        | 10.79      |
| Bridge                   | 0.00            | 0.00        | 0.00        | 0.11       |
| Climb                    | 2.05            | 1.01        | 0.00        | 1.08       |
| Climb beak-assisted      | 0.86            | 2.51        | 0.00        | 0.83       |
| Climb wing-assisted      | 1.08            | 0.00        | 0.00        | 0.90       |
| Descent                  | 0.54            | 0.00        | 0.00        | 0.40       |
| Descent beak-assisted    | 0.32            | 0.00        | 0.00        | 0.36       |
| Descent wing-assisted    | 0.97            | 0.00        | 0.00        | 0.32       |
| Hop                      | 1.19            | 1.51        | 0.00        | 0.51       |
| Leap                     | 0.22            | 0.00        | 0.00        | 0.22       |
| Leap wing-assisted       | 7.34            | 3.02        | 0.00        | 0.69       |
| Run                      | 0.00            | 0.00        | 0.00        | 0.29       |
| Sidling                  | 3.13            | 0.00        | 0.00        | 3.46       |
| Suspensory               | 0.00            | 0.00        | 0.00        | 0.14       |
| Uprighting               | 0.22            | 0.00        | 0.00        | 0.11       |
| Walk                     | 1.51            | 1.51        | 0.00        | 7.43       |
| Number of observations   | 927             | 199         | 11          | 2772       |
| <b>Posture</b>           |                 |             |             |            |
| Cantilevering            | 0.30            | 0.00        | 0.00        | 0.22       |
| Cling                    | 0.54            | 2.65        | 0.00        | 0.14       |
| Hang                     | 0.15            | 0.00        | 0.00        | 0.22       |
| Perch                    | 98.57           | 97.35       | 0.00        | 96.24      |
| Stand                    | 0.44            | 0.00        | 0.00        | 3.18       |
| Number of observations   | 2027            | 340         | 0           | 4970       |

**Supplemental Table S3.** Overall percentage (%) of substrate type and the associated positional behaviors observed on these substrates collected from an established colony of Quaker parrots (*Myiopsitta monachus*) from Brooklyn, New York City during the study period. No substrate or orientation code was scored if the animals' feet were not in contact with the support (e.g., flight, hovering).

|                          | Ground | Very large | Large | Medium | Small | Terminal | Nest  | Artificial |
|--------------------------|--------|------------|-------|--------|-------|----------|-------|------------|
| Pooled                   | 4.05   | 0.21       | 0.45  | 5.43   | 14.70 | 19.80    | 44.76 | 10.60      |
| Number of observations   | 342    | 18         | 38    | 458    | 1240  | 1670     | 3776  | 894        |
| Locomotion               |        |            |       |        |       |          |       |            |
| Flight                   | na     | na         | na    | na     | na    | na       | na    | na         |
| Hover                    | na     | na         | na    | na     | na    | na       | na    | na         |
| Flight short interbranch | 0.00   | 50.00      | 0.00  | 23.61  | 33.33 | 52.84    | 64.54 | 18.99      |
| Bridge                   | 0.00   | 0.00       | 0.00  | 2.78   | 0.48  | 0.00     | 0.00  | 0.00       |
| Climb                    | 0.00   | 0.00       | 0.00  | 2.78   | 2.86  | 0.57     | 10.25 | 6.33       |
| Climb beak-assisted      | 0.00   | 50.00      | 14.29 | 0.00   | 4.29  | 0.57     | 4.43  | 6.33       |
| Climb wing-assisted      | 0.00   | 0.00       | 0.00  | 0.00   | 0.00  | 0.00     | 8.31  | 6.33       |
| Descent                  | 0.00   | 0.00       | 0.00  | 4.17   | 1.90  | 1.14     | 1.94  | 0.00       |
| Descent beak-assisted    | 0.00   | 0.00       | 14.29 | 0.00   | 0.95  | 1.70     | 1.39  | 2.53       |
| Descent wing-assisted    | 0.00   | 0.00       | 0.00  | 0.00   | 2.38  | 0.00     | 2.22  | 6.33       |
| Hop                      | 5.95   | 0.00       | 14.29 | 4.17   | 2.86  | 0.00     | 1.11  | 3.80       |
| Leap                     | 0.00   | 0.00       | 14.29 | 0.00   | 2.38  | 0.00     | 0.00  | 2.53       |
| Leap wing-assisted       | 0.00   | 0.00       | 0.00  | 5.56   | 7.14  | 38.07    | 0.00  | 8.86       |
| Run                      | 2.70   | 0.00       | 0.00  | 0.00   | 0.95  | 0.00     | 0.00  | 1.27       |
| Sidling                  | 0.00   | 0.00       | 0.00  | 40.28  | 35.24 | 3.41     | 3.60  | 3.80       |
| Suspensory               | 0.00   | 0.00       | 0.00  | 0.00   | 0.95  | 0.57     | 0.00  | 1.27       |
| Uprighting               | 0.00   | 0.00       | 0.00  | 0.00   | 1.43  | 0.00     | 0.55  | 0.00       |
| Walk                     | 91.35  | 0.00       | 42.86 | 16.67  | 2.86  | 1.14     | 1.66  | 31.65      |
| Number of observations   | 185    | 8          | 7     | 72     | 210   | 176      | 361   | 79         |
| Posture                  |        |            |       |        |       |          |       |            |
| Cantilevering            | 0.00   | 0.00       | 0.00  | 0.52   | 0.00  | 0.00     | 0.44  | 0.00       |
| Cling                    | 0.00   | 60.00      | 16.13 | 0.00   | 0.00  | 0.00     | 0.23  | 0.98       |
| Hang                     | 0.00   | 0.00       | 0.00  | 0.00   | 0.68  | 0.20     | 0.12  | 0.00       |
| Perch                    | 0.00   | 40.00      | 83.87 | 98.96  | 99.32 | 99.80    | 99.21 | 98.04      |
| Stand                    | 100.00 | 0.00       | 0.00  | 0.52   | 0.00  | 0.00     | 0.00  | 0.98       |
| Number of observations   | 157    | 10         | 31    | 386    | 1029  | 1494     | 3416  | 815        |

**Supplemental Table S4.** Overall percentage (%) of sampling effort during the study period and the associated positional behaviors observed during each month collected from an established colony of Quaker parrots (*Myiopsitta monachus*) from Brooklyn, New York City during the study period. No substrate or orientation code was scored if the animals' feet were not in contact with the support (e.g., flight, hovering).

|                          | January | February | March | April | May   | June  |
|--------------------------|---------|----------|-------|-------|-------|-------|
| Pooled                   | 1.52    | 24.79    | 29.88 | 10.38 | 12.60 | 20.84 |
| Number of observations   | 171     | 2789     | 3361  | 1168  | 1417  | 2344  |
| Locomotion               |         |          |       |       |       |       |
| Flight                   | 76.92   | 69.58    | 51.65 | 63.35 | 81.50 | 76.71 |
| Hover                    | 0.00    | 3.08     | 6.03  | 8.74  | 2.97  | 2.90  |
| Flight short interbranch | 3.85    | 8.87     | 18.37 | 13.11 | 6.11  | 7.04  |
| Bridge                   | 0.00    | 0.37     | 0.00  | 0.00  | 0.00  | 0.00  |
| Climb                    | 0.00    | 0.74     | 2.83  | 0.73  | 0.35  | 0.93  |
| Climb beak-assisted      | 0.00    | 1.11     | 1.10  | 0.24  | 0.70  | 1.04  |
| Climb wing-assisted      | 0.00    | 1.23     | 1.10  | 0.00  | 0.00  | 1.35  |
| Descent                  | 0.00    | 0.00     | 0.18  | 0.24  | 1.40  | 0.52  |
| Descent beak-assisted    | 1.92    | 0.49     | 0.46  | 0.00  | 0.17  | 0.21  |
| Descent wing-assisted    | 0.00    | 0.86     | 0.37  | 0.00  | 0.00  | 0.72  |
| Hop                      | 0.00    | 1.48     | 0.27  | 0.00  | 1.22  | 0.62  |
| Leap                     | 0.00    | 0.37     | 0.18  | 0.00  | 0.35  | 0.10  |
| Leap wing-assisted       | 5.77    | 4.80     | 4.66  | 0.00  | 0.00  | 0.00  |
| Run                      | 0.00    | 0.00     | 0.09  | 0.00  | 0.35  | 0.52  |
| Sidling                  | 7.69    | 4.19     | 3.29  | 5.58  | 0.52  | 2.59  |
| Suspensory               | 0.00    | 0.00     | 0.09  | 0.00  | 0.00  | 0.31  |
| Uprighting               | 0.00    | 0.12     | 0.18  | 0.00  | 0.17  | 0.10  |
| Walk                     | 3.85    | 2.71     | 9.14  | 8.01  | 4.19  | 4.35  |
| Number of observations   | 52      | 812      | 1094  | 412   | 573   | 966   |
| Posture                  |         |          |       |       |       |       |
| Cantilevering            | 0.00    | 0.05     | 0.22  | 0.00  | 0.59  | 0.44  |
| Cling                    | 3.36    | 0.81     | 0.26  | 0.53  | 0.12  | 0.00  |
| Hang                     | 0.00    | 0.10     | 0.49  | 0.13  | 0.00  | 0.00  |
| Perch                    | 96.64   | 98.48    | 97.35 | 98.54 | 93.36 | 95.07 |
| Stand                    | 0.00    | 0.56     | 1.68  | 0.79  | 5.92  | 4.50  |
| Number of observations   | 119     | 1977     | 2267  | 756   | 844   | 1378  |

**Supplemental Table S5.** Overall percentage (%) of substrate-orientation and the associated positional behaviors observed on these orientations collected from an established colony of Quaker parrots (*Myiopsitta monachus*) from Brooklyn, New York City during the study period. No substrate or orientation code was scored if the animals' feet were not in contact with the support (e.g., flight, hovering).

|                          | <b>Horizontal</b> | <b>Oblique</b> | <b>Vertical</b> |
|--------------------------|-------------------|----------------|-----------------|
| Pooled                   | 69.24             | 25.64          | 5.12            |
| Number of observations   | 5841              | 2163           | 431             |
| Locomotion               |                   |                |                 |
| Flight                   | na                | na             | na              |
| Hover                    | na                | na             | na              |
| Flight short interbranch | 29.93             | 42.14          | 60.38           |
| Bridge                   | 0.18              | 0.63           | 0.00            |
| Climb                    | 0.70              | 3.14           | 17.45           |
| Climb beak-assisted      | 0.70              | 1.89           | 12.26           |
| Climb wing-assisted      | 5.81              | 0.00           | 0.94            |
| Descent                  | 0.00              | 1.89           | 4.72            |
| Descent beak-assisted    | 0.18              | 1.57           | 3.30            |
| Descent wing-assisted    | 2.29              | 0.94           | 0.94            |
| Hop                      | 3.87              | 1.89           | 0.00            |
| Leap                     | 1.23              | 0.31           | 0.00            |
| Leap wing-assisted       | 3.17              | 23.58          | 0.00            |
| Run                      | 1.41              | 0.00           | 0.00            |
| Sidling                  | 13.38             | 15.41          | 0.00            |
| Suspensory               | 0.53              | 0.31           | 0.00            |
| Uprighting               | 0.88              | 0.00           | 0.00            |
| Walk                     | 35.74             | 6.29           | 0.00            |
| Number of observations   | 568               | 318            | 212             |
| Posture                  |                   |                |                 |
| Cantilevering            | 0.06              | 0.00           | 6.39            |
| Cling                    | 0.02              | 0.16           | 10.50           |
| Hang                     | 0.13              | 0.38           | 0.00            |
| Perch                    | 96.62             | 99.46          | 83.11           |
| Stand                    | 3.17              | 0.00           | 0.00            |
| Number of observations   | 5273              | 1845           | 219             |
